# Supplementary figures and images for: A Systematic Pan-Cancer Analysis of YY1 Aberrations and their Relationship with Clinical Outcome, Tumor Microenvironment, and Therapeutic Targets
Source: Hindawi journal article supplement (doi:10.1155/2022/5826741), 2022-06-24

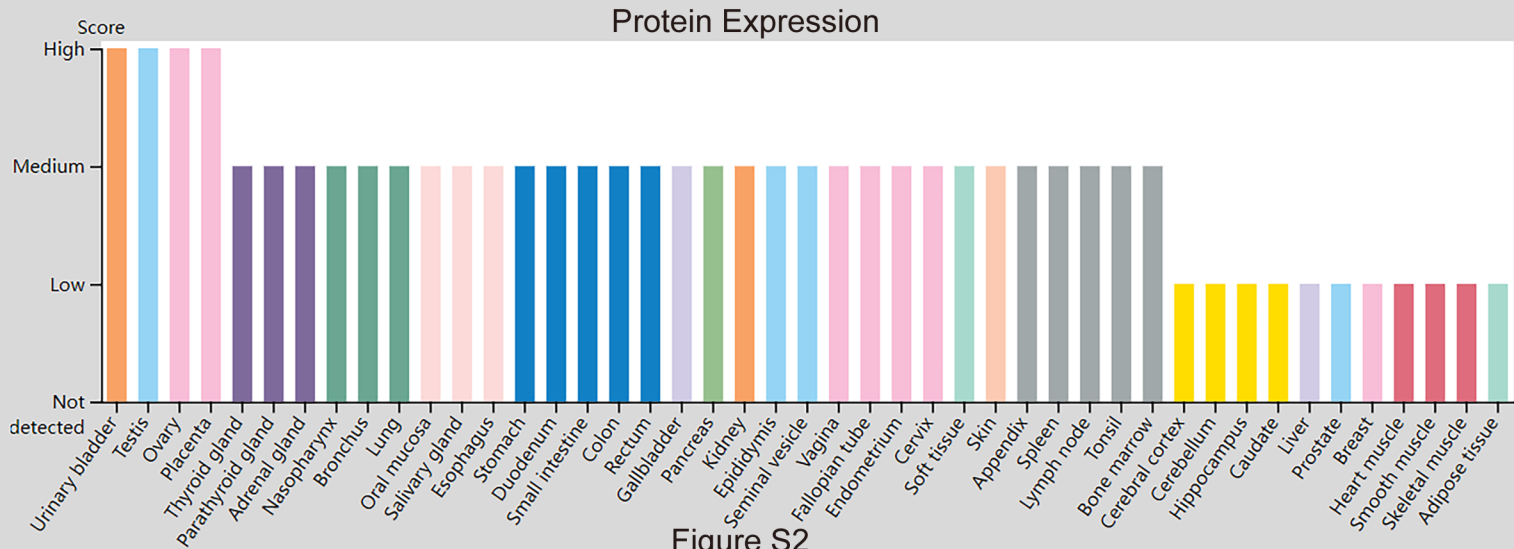

Supplement: f1 [file 5826741.f1.zip]

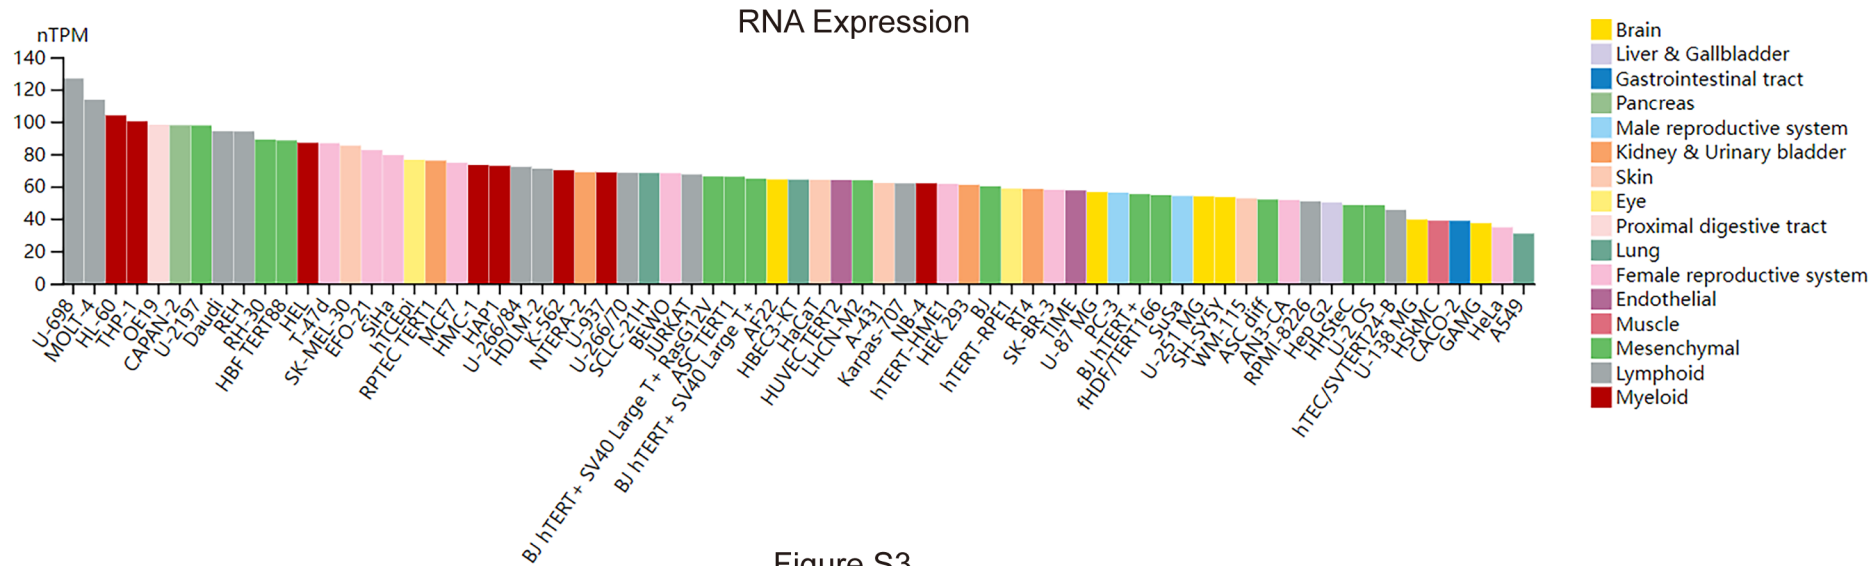

Figure S3  
The RNA expression of YY1 in various cancer cell lines.

Supplement: f1 [file 5826741.f1.zip]

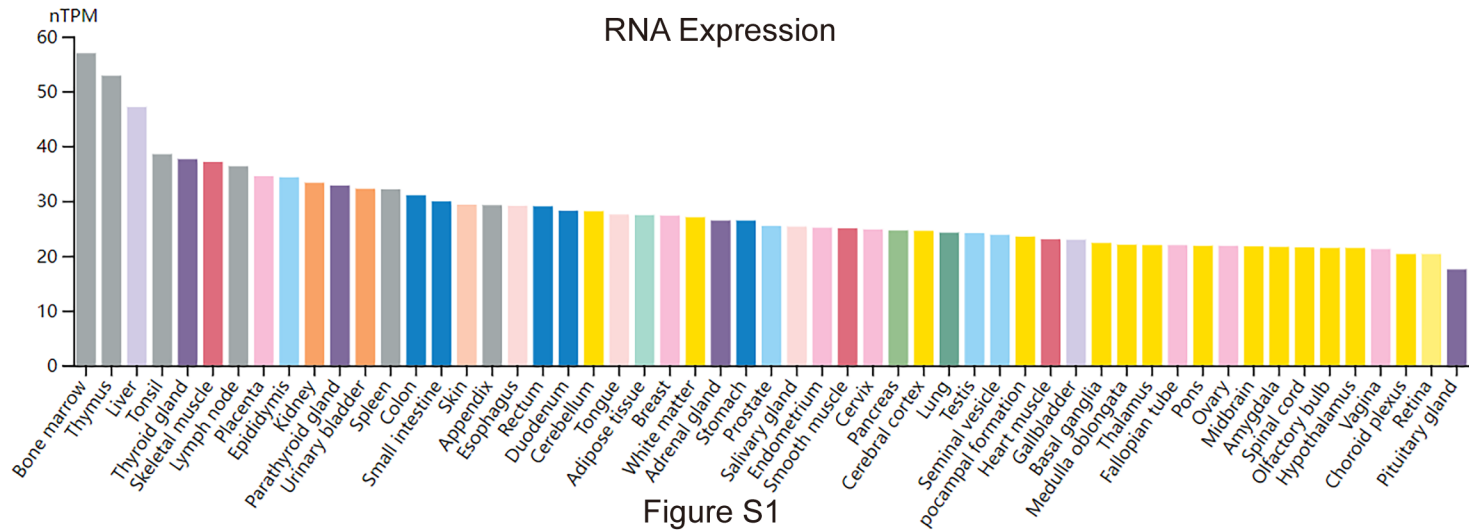

Figure S1  
The RNA expression of YY1 in normal human tissues.

Supplement: f1 [file 5826741.f1.zip]

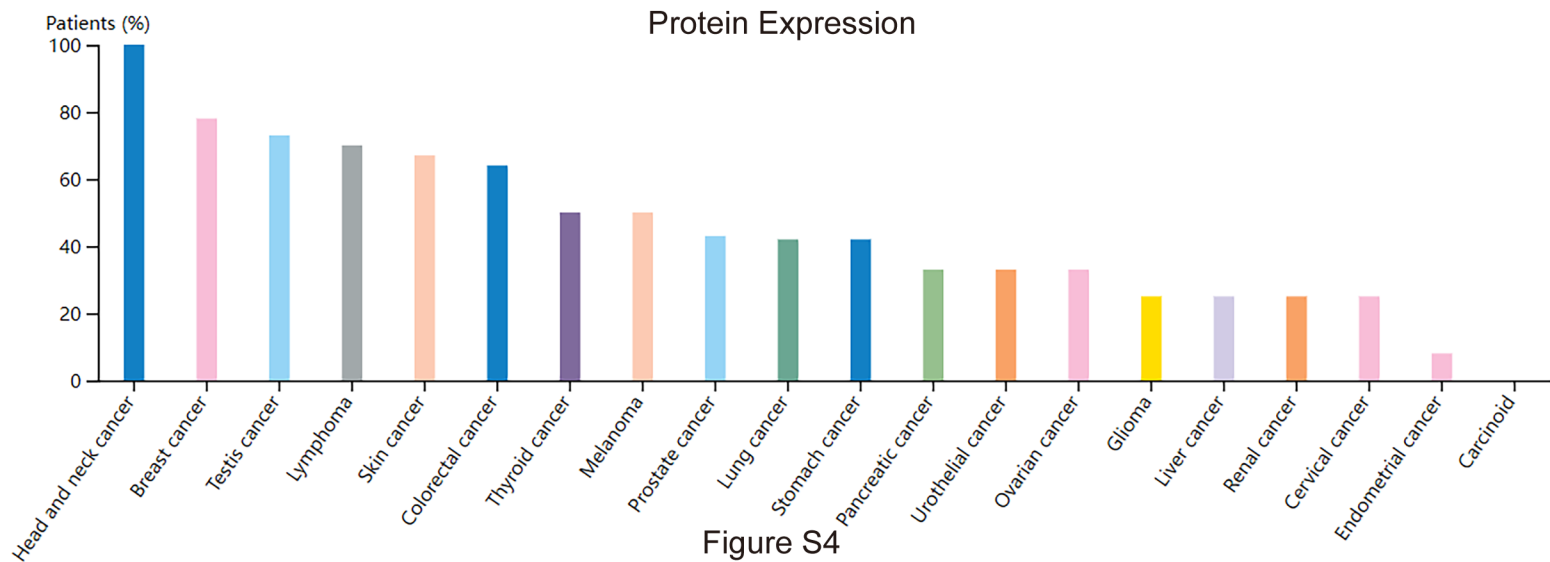

Figure S4  
The protein expression of YY1 in different human cancer tissues.

Supplement: f1 [file 5826741.f1.zip]

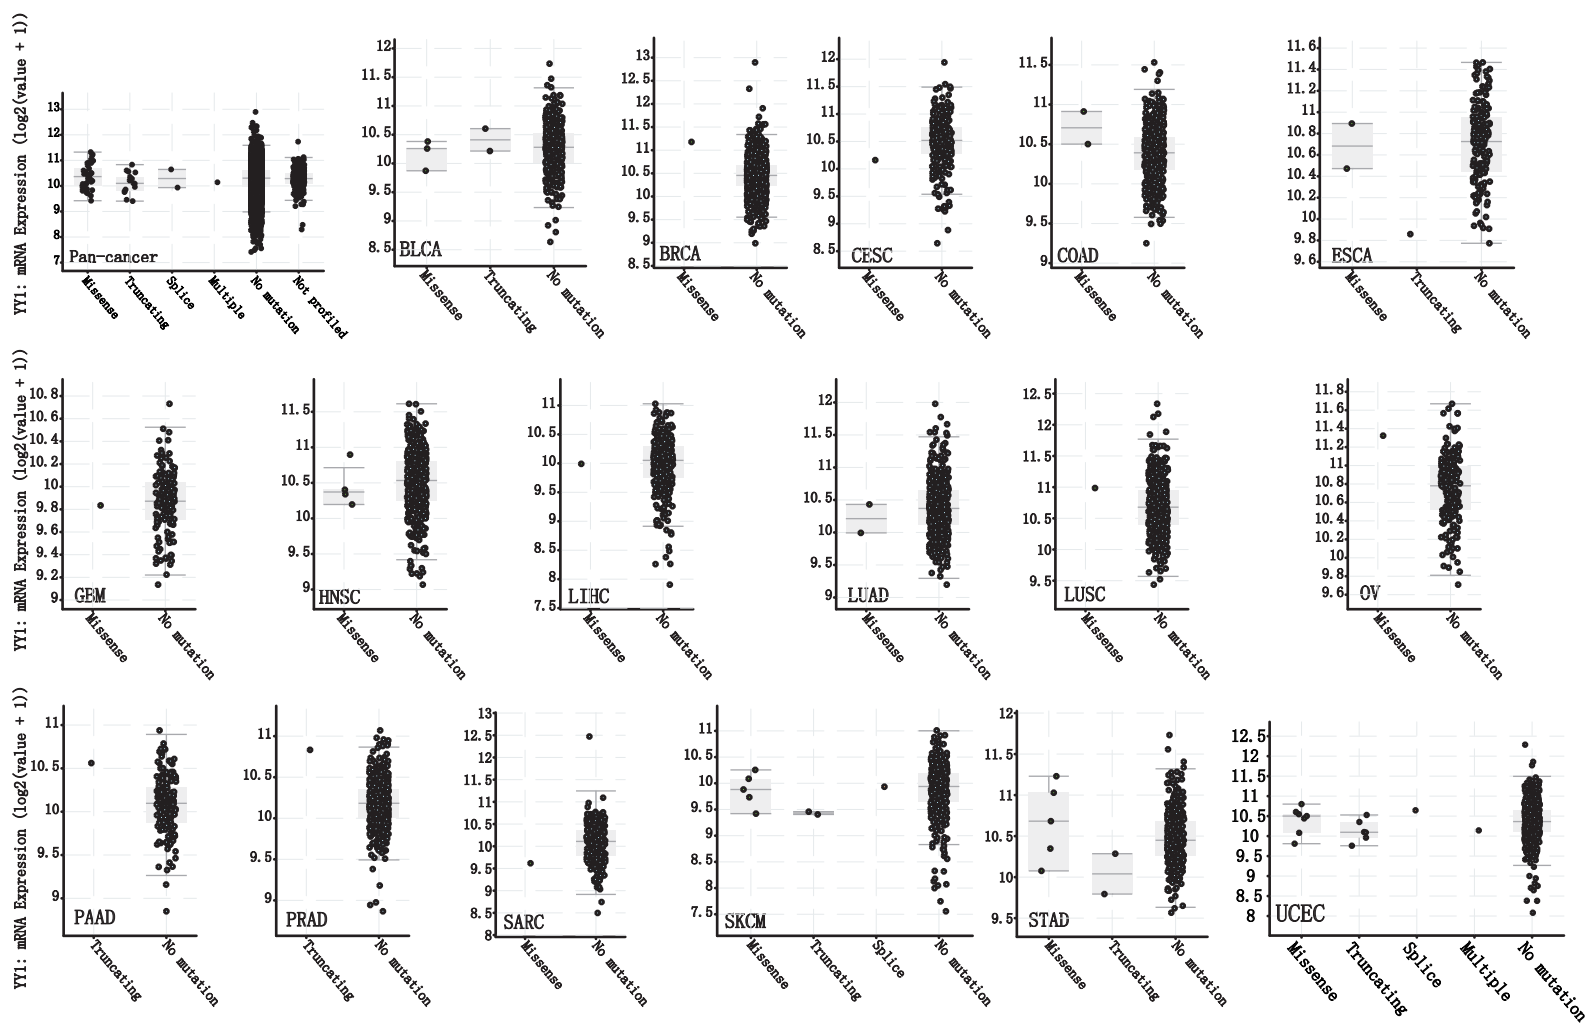

Figure S5

The effect of YY1 mutation on expression

Supplement: f1 [file 5826741.f1.zip]
